# Supplementary material for: Evaluating precision medicine approaches for gene therapy in patient-specific cellular models of Bietti crystalline dystrophy
Source: PubMed Central journal article supplement (PMC11343589; doi:10.1172/jci.insight.177231), 2024-07-16

Figure 1B BCD-P1 P6 CYP4V2

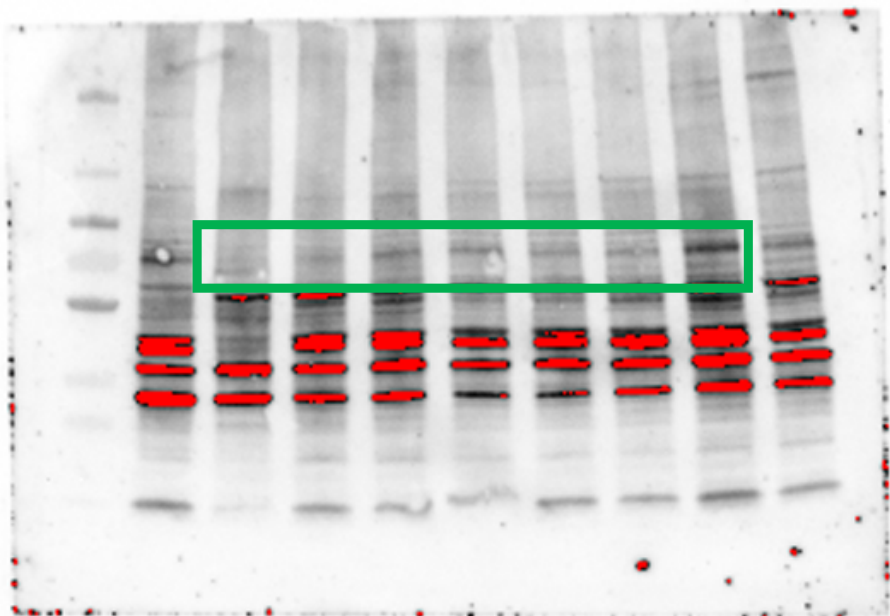

Full unedited gel for Figure S3B

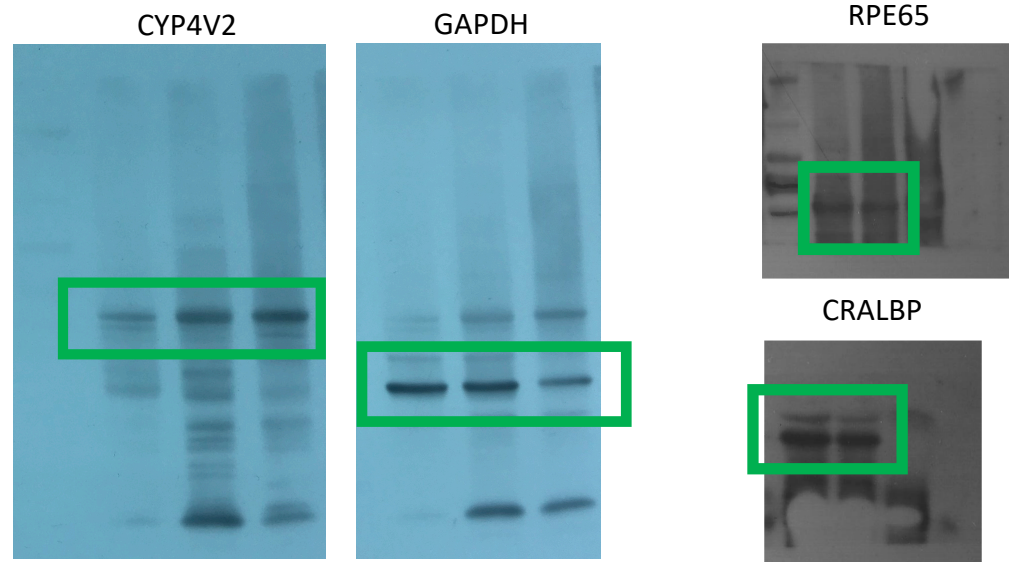

GAPDH

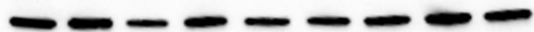

Full unedited gel for Figure S1D: P1-P3

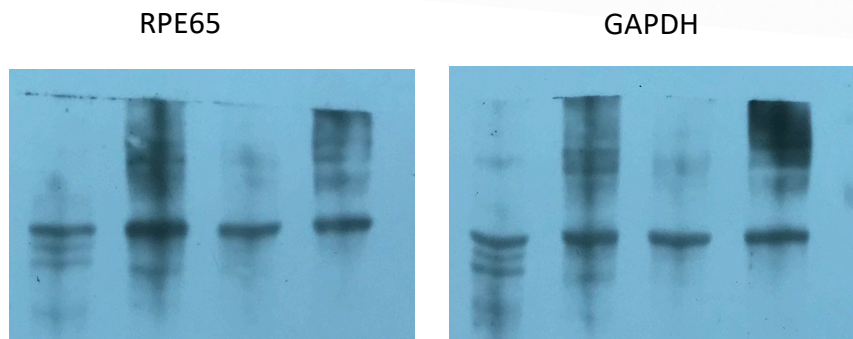

Full unedited gel for Figure S1D: P4-P6

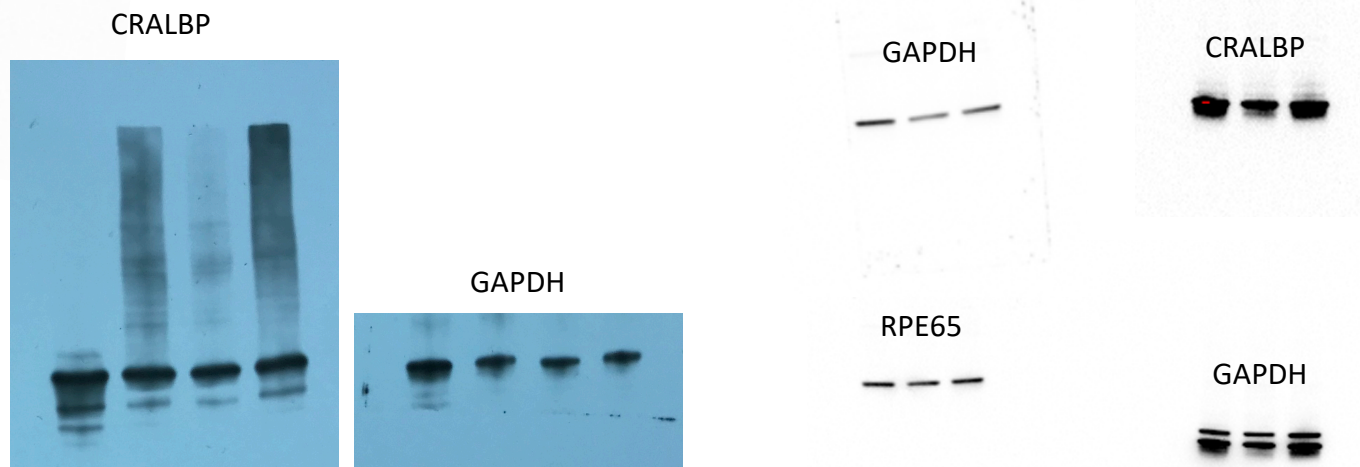

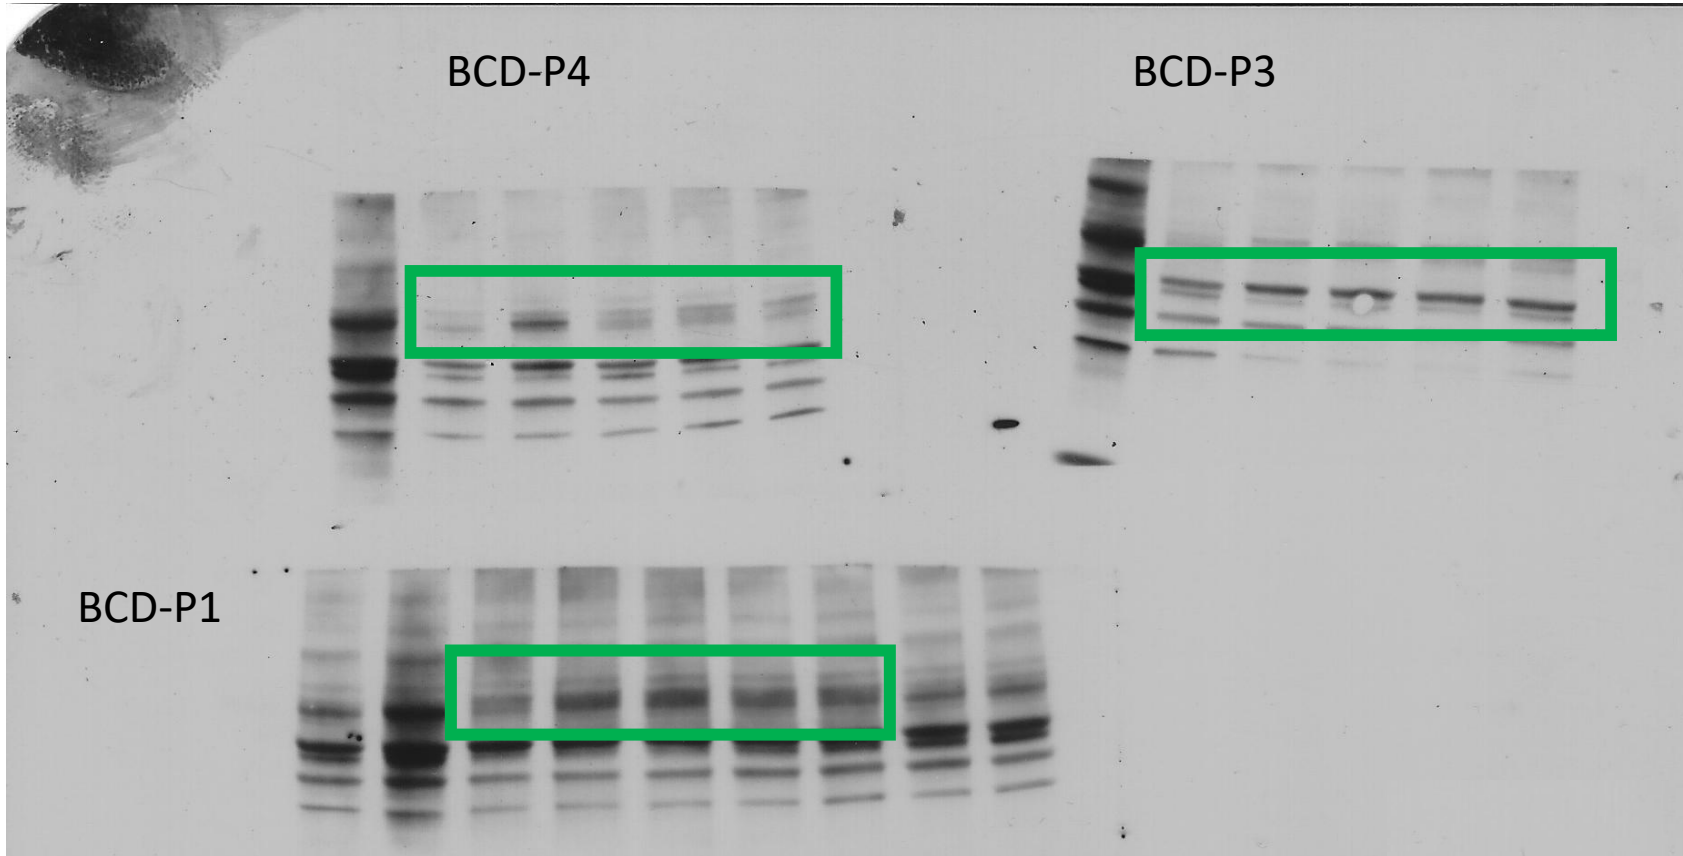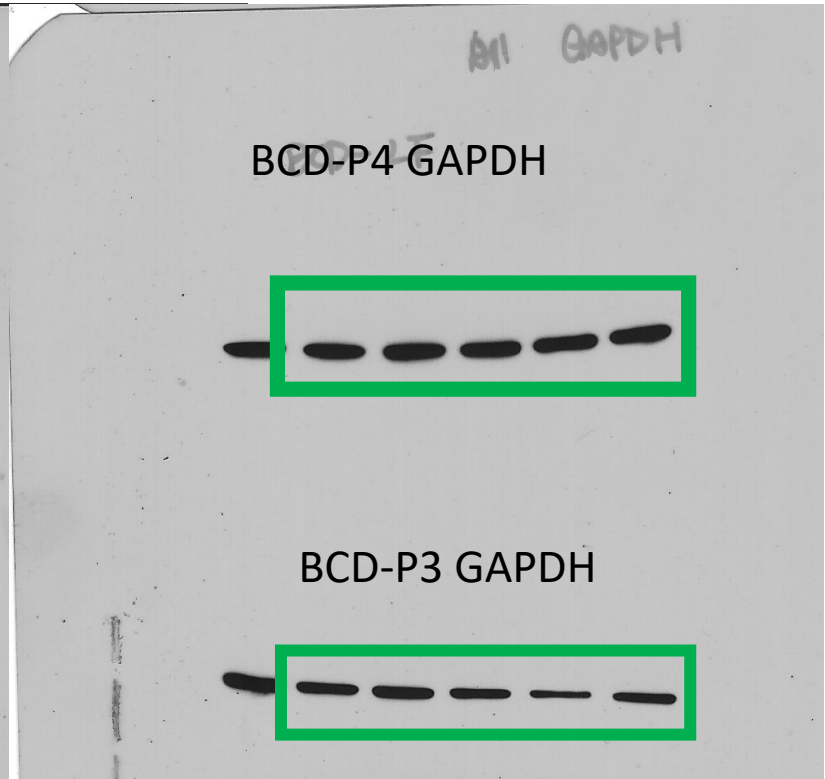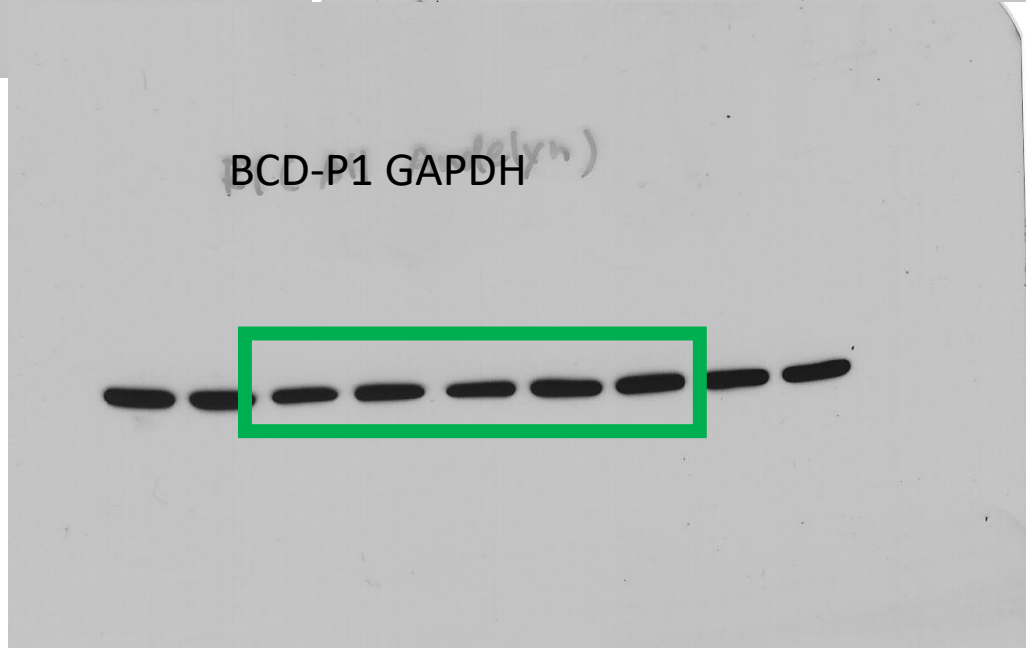

Figure 4A, BCD-P1, P3, P4

Figure 4A, BCD-P2, P5, P6

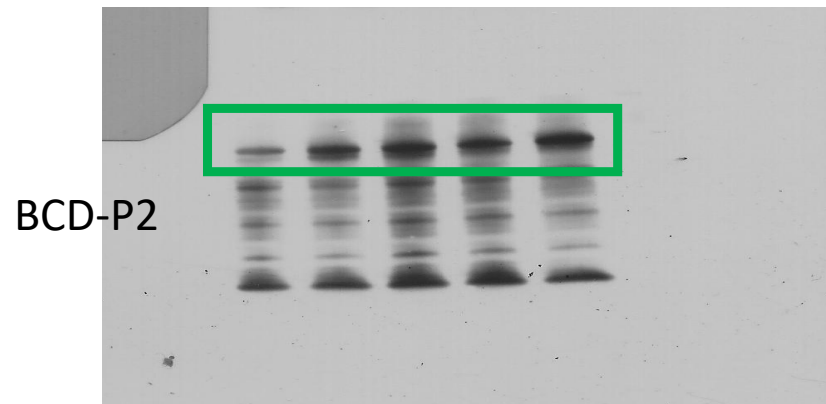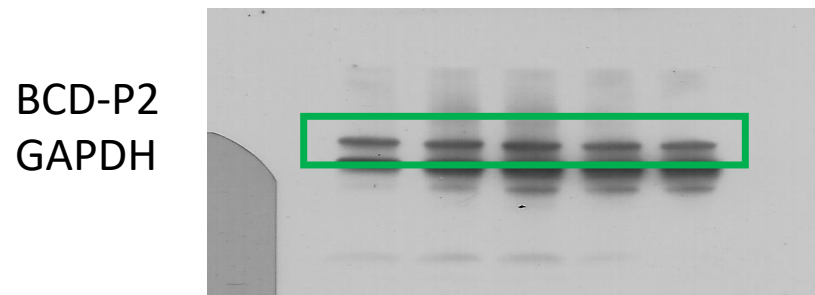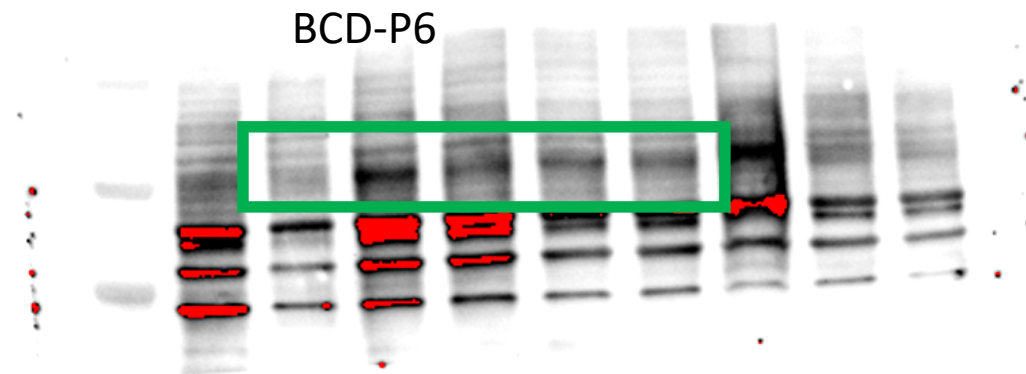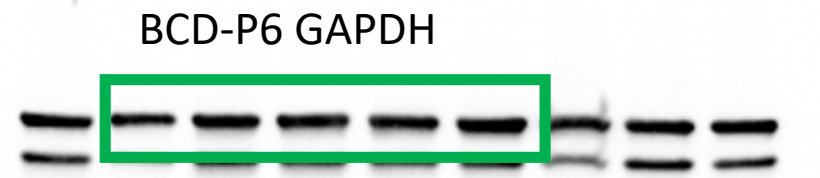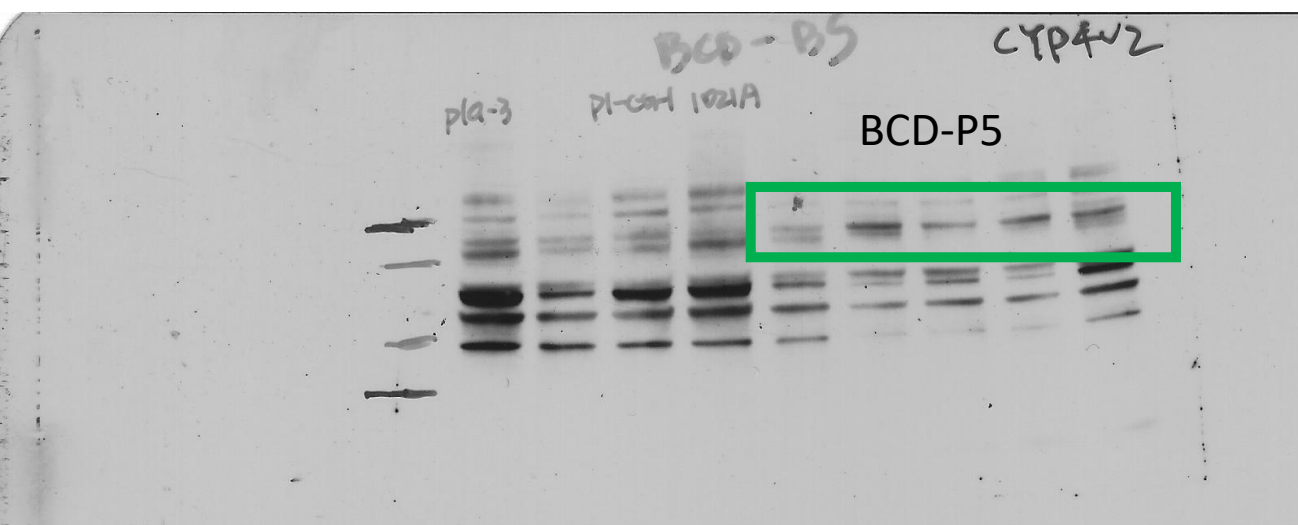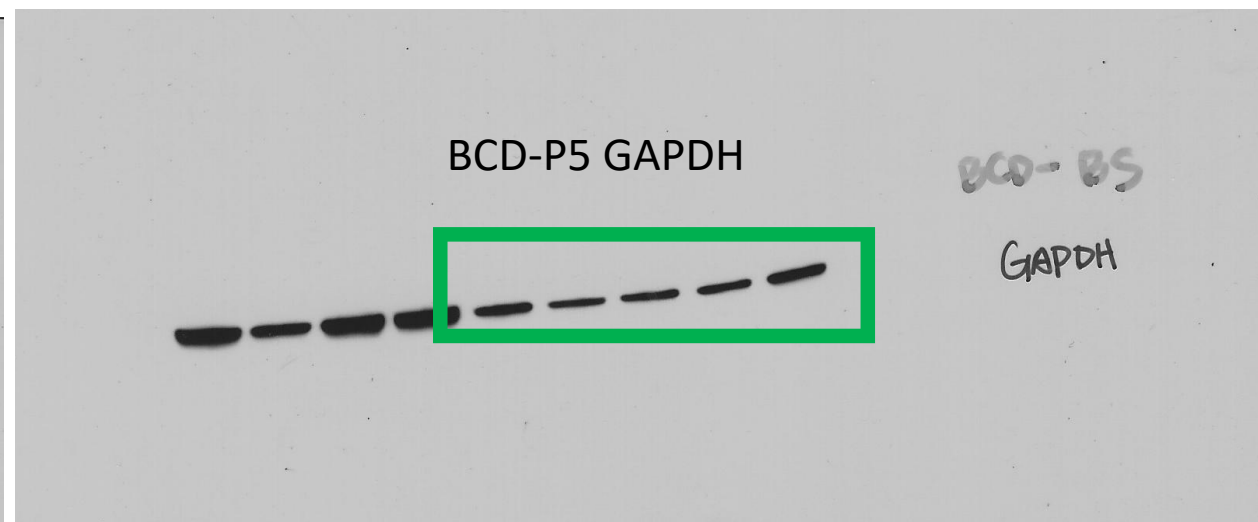

Full unedited gel for Figure S1E

BCD-P1

BCD-P2, BCD-P3

BCD-P4, BCD-P5, BCD-P6

CYP4V2

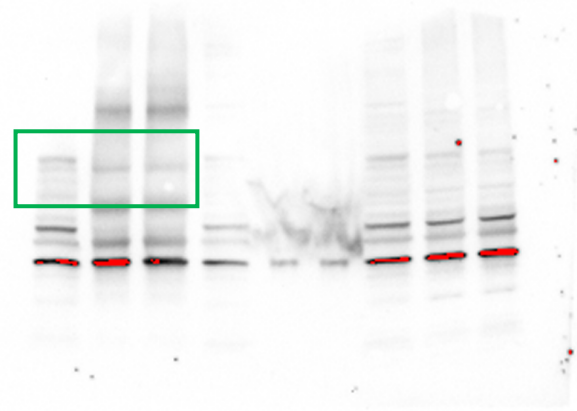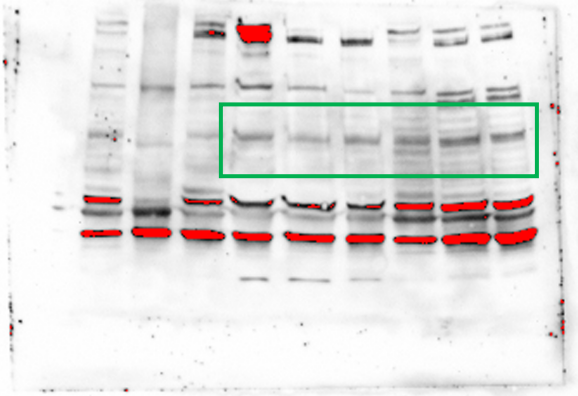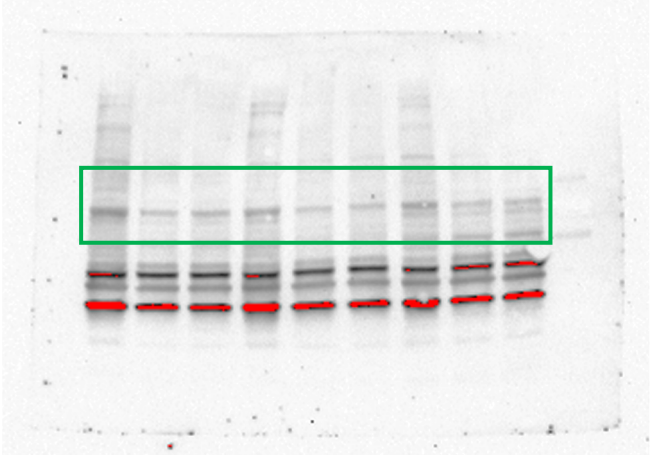

GAPDH

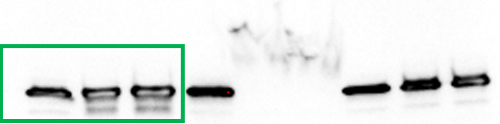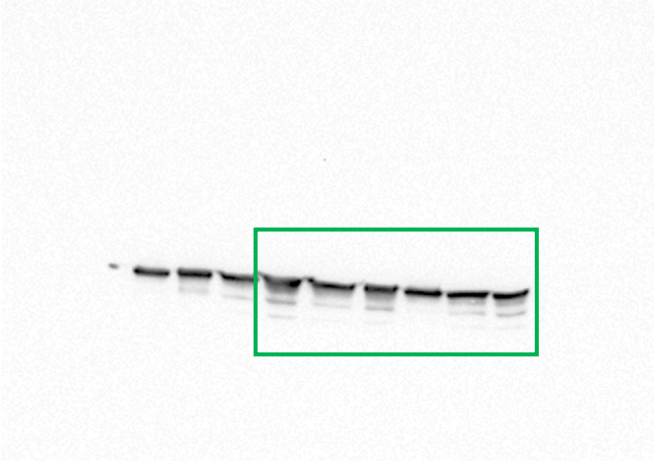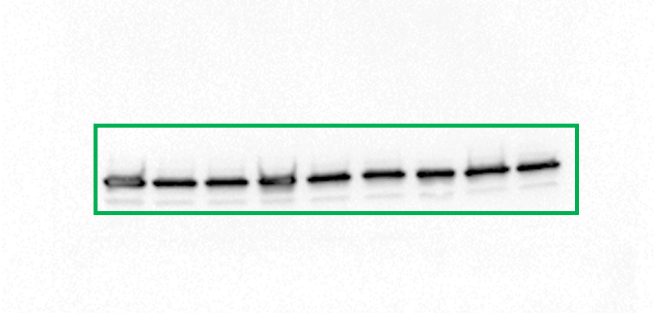

Supplement: jciinsight-9-177231-s242.pdf [file jciinsight-9-177231-s242.pdf]
